# Supplementary material for: 24-Epibrassinolide Promotes Fatty Acid Accumulation and the Expression of Related Genes in Styrax tonkinensis Seeds
Source: MDPI journal article supplement (doi:10.3390/ijms23168897), 2022-08-10
Supplement: s1 [file s1]

**Table S4.** Primers used in this experiment.

| Primer  | Sequence              |
|---------|-----------------------|
| ACSL-F  | TTGTTGGTGGATTCAGTG    |
| ACSL-R  | ATGCCTTTCTCATCAACCTG  |
| FAD2-F  | AGCCGCCCTTCACTGTTG    |
| FAD2-R  | GCGTTGCCATACTTCTCG    |
| EAR-F   | TGCTATCCAAAGCCAGTC    |
| EAR-R   | CAAATGCTCCTATCCAGAA   |
| SAD2-F  | CCTCTACTTTCCACCTACC   |
| SAD2-R  | CAGCCCACTTGATGTATG    |
| KAR-F   | TGCCAACCAAACCAACAA    |
| KAR-R   | ACTCGGGATGGGCTGATG    |
| FATB-F  | GTTCTTCCCTTCACAATC    |
| FATB-R  | AGTCCCTCACTGCTGTAT    |
| ACSF3-F | TGCTGGAATACTAGGGACT   |
| ACSF3-R | CATAGAAAGGGACAAGAAAA  |
| KASII-F | GTAAATGGGATGAGGGAC    |
| KASII-R | CAAACCTTATGGCATAGGAA  |
| accA-F  | AGTCTTTCCTGCCTTTGC    |
| accA-R  | TTGAGCCACCTTCGTTCT    |
| accB-F  | TGCTCCTGTCGTTATGTT    |
| accB-R  | TAAGAGGTGGAAGGGATG    |
| 18s-F   | AGTATGGTCGCAAGGCTGAAA |
| 18s-R   | CAGACAAATCGCTCCACCAA  |
