# Supplementary material for: 24-Epibrassinolide Promotes Fatty Acid Accumulation and the Expression of Related Genes in Styrax tonkinensis Seeds
Source: MDPI journal article supplement (doi:10.3390/ijms23168897), 2022-08-10
Supplement: s1 [file s1]

**Table S1.** FA compositions in *S. tonkinensis* seeds under EBL5 at four sampling periods.

|       | FA composition (%) |            |            |            |            |            |            |            |
|-------|--------------------|------------|------------|------------|------------|------------|------------|------------|
|       | 50 DAF             |            | 70 DAF     |            | 100 DAF    |            | 130 DAF    |            |
|       | CK                 | EBL5       | CK         | EBL5       | CK         | EBL5       | CK         | EBL5       |
| C14:0 | 0.17±0.06          | 0.10±0.05  | 0.08±0.04  | 0.02±0.02  | 0.08±0.05  | 0.08±0.03  | 0.08±0.06  | 0.07±0.03  |
| C15:0 | 0.10±0.02          | 0.14±0.02  | 0.04±0.02  | 0.02±0.01  | 0.02±0.01  | 0.02±0.05  | 0.02±0.01  | 0.02±0.01  |
| C16:0 | 25.53±2.02         | 24.27±2.12 | 17.29±3.15 | 18.35±1.02 | 11.73±0.94 | 10.95±1.19 | 10.41±2.26 | 10.44±1.31 |
| C16:1 | 0.24±0.02          | 0.27±0.05  | 0.14±0.04  | 0.19±0.05  | 0.18±0.01  | 0.16±0.07  | 0.13±0.08  | 0.15±0.05  |
| C17:0 | 0.64±0.03          | 0.58±0.03  | 0.79±0.32  | 0.72±0.11  | 0.43±0.16  | 0.46±0.14  | 0.37±0.11  | 0.43±0.08  |
| C17:1 | 0.41±0.03          | 0.34±0.02  | 0.37±0.18  | 0.36±0.07  | 0.31±0.10  | 0.31±0.02  | 0.24±0.06  | 0.25±0.05  |
| C18:0 | 5.95±0.78          | 5.26±0.47  | 3.17±0.74  | 3.18±0.35  | 2.58±1.27  | 3.18±1.89  | 3.79±1.57  | 3.65±0.67  |
| C18:1 | 13.80±1.30         | 15.69±1.56 | 11.65±2.06 | 11.72±1.12 | 23.33±2.65 | 25.14±3.17 | 29.36±2.00 | 27.00±1.50 |
| C18:2 | 24.86±1.70         | 26.18±1.78 | 53.86±5.04 | 51.98±4.43 | 53.43±6.00 | 50.59±6.57 | 44.25±7.00 | 46.89±5.50 |
| C18:3 | 18.63±1.85         | 18.01±0.99 | 8.52±1.50  | 9.29±0.68  | 6.89±1.17  | 7.64±1.84  | 9.99±2.62  | 9.72±1.17  |
| C20:0 | 2.30±0.22          | 2.26±0.62  | 0.85±0.16  | 0.82±0.07  | 0.24±0.14  | 0.38±0.03  | 0.38±0.13  | 0.41±0.05  |
| C20:1 | 1.45±0.25          | 1.16±0.20  | 0.61±0.24  | 0.51±0.08  | 0.24±0.08  | 0.29±0.04  | 0.37±0.18  | 0.31±0.15  |
| C20:2 | 0.41±0.01          | 0.44±0.02  | 0.22±0.01  | 0.31±0.02  | 0.06±0.03  | 0.08±0.03  | 0.05±0.01  | 0.07±0.01  |
| C20:3 | 0.37±0.01          | 0.38±0.01  | 0.20±0.01  | 0.24±0.01  | 0.03±0.01  | 0.05±0.02  | 0.02±0.02  | 0.03±0.01  |
| C21:0 | 0.61±0.02          | 0.58±0.03  | 0.30±0.04  | 0.31±0.01  | 0.04±0.02  | 0.07±0.03  | 0.04±0.01  | 0.05±0.01  |
| C22:0 | 1.72±0.22          | 1.74±0.14  | 0.65±0.11  | 0.65±0.04  | 0.16±0.01  | 0.22±0.11  | 0.20±0.03  | 0.23±0.02  |
| C22:1 | 0.17±0.06          | ND         | ND         | ND         | ND         | ND         | 0.02±0.01  | 0.01±0.01  |
| C23:0 | 0.54±0.02          | 0.55±0.02  | 0.28±0.03  | 0.31±0.01  | 0.06±0.03  | 0.09±0.04  | 0.06±0.01  | 0.07±0.04  |
| C24:0 | 1.62±0.16          | 1.57±0.14  | 0.71±0.11  | 0.70±0.05  | 0.14±0.10  | 0.23±0.13  | 0.17±0.08  | 0.19±0.02  |
| C24:1 | 0.47±0.01          | 0.48±0.01  | 0.28±0.02  | 0.31±0.02  | 0.06±0.04  | 0.06±0.01  | 0.04±0.02  | 0.03±0.01  |

Note: ND indicated not detected. C14:0, tetradecanoic acid; C15:0, pentadecanoic acid; C16:0, palmitic acid; C16:1, palmitoleic acid;

C17:0, heptadecanoic acid; C17:1, ginkgolic acid; C18:0, stearic acid; C18:1, oleic acid; C18:2, linoleic acid; C18:3, linolenic acid;  
C20:0, eicosanoic acid; C20:1, cis-11-eicosenic acid; C20:2, cis-11,14-eicosadienoic acid; C20:3, cis-11,14,17-eicosatrienoic acid;  
C21:0, n-heneicosanoic acid; C22:0, docosanoic acid; C22:1, erucic acid; C23:0, tricosanoic acid; C24:0, lignoceric acid;  
C24:1, nervonic acid.
